# Supplementary material
Source: PubMed Central journal article supplement (PMC3616380)

Figure S1

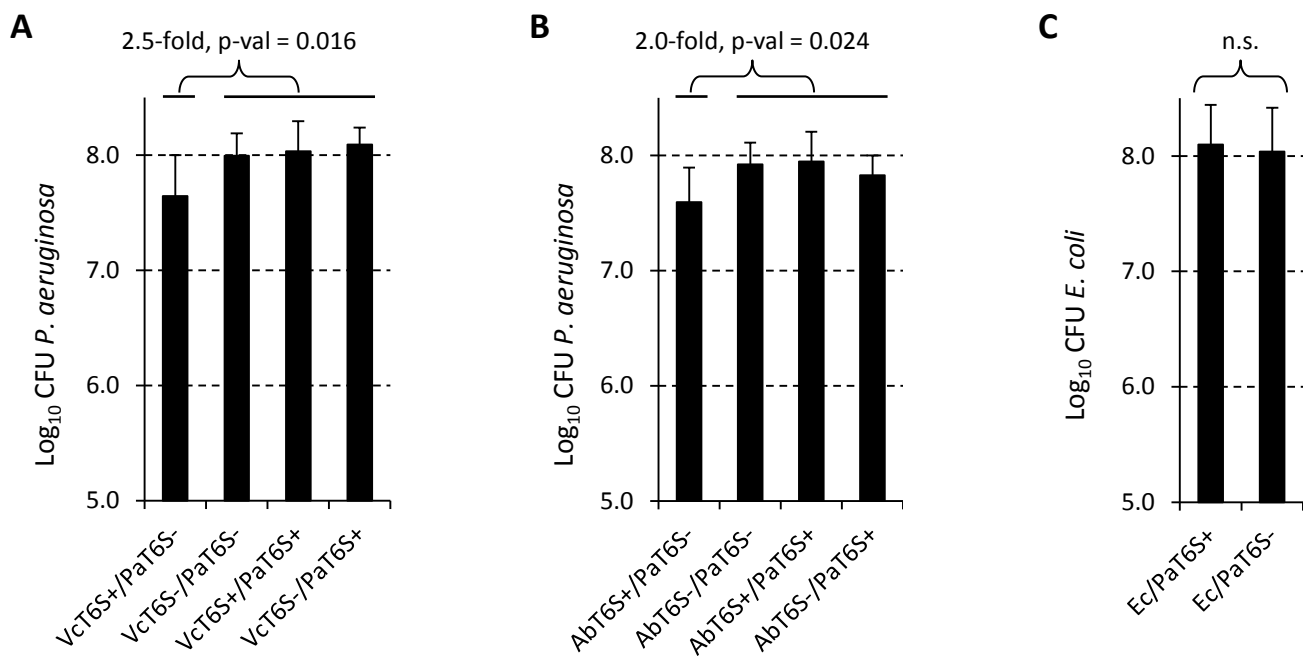

Supplement: NIHMS445331-supplement-05.pdf [file NIHMS445331-supplement-05.pdf]
